# Supplementary material for: A facile interfacial assembling strategy for synthesizing yellow TiO2flakes with a narrowed bandgap
Source: Royal Society of Chemistry journal article supplement (doi:10.1039/c5ra08101g), 2015-01-01
Supplement: c5ra08101g1.pdf [file c5ra08101g1.pdf]

## Supporting Information for

### **A Facile Interfacial Assembling Strategy for Synthesizing Yellow TiO<sub>2</sub> Flakes with a Narrowed Bandgap**

Jingyu Wang<sup>a,\*</sup>, Yizhi Zhao<sup>b</sup>, Xiaochan Xu<sup>a</sup>, Xiaoli Feng<sup>a</sup>, Junxia Yu<sup>c</sup>, Tao Li<sup>a,\*</sup>

<sup>a</sup> *Key Laboratory for Large-Format Battery Materials and System (Ministry of Education),*

*School of Chemistry and Chemical Engineering, Huazhong University of Science and  
Technology, Wuhan 430074, China*

<sup>b</sup> *Department of Chemistry, Harbin Institute of Technology, Harbin 150001, China*

<sup>c</sup> *School of Chemistry and Environmental Engineering, Wuhan Institute of Technology,  
Wuhan 430074, China*

## Figures

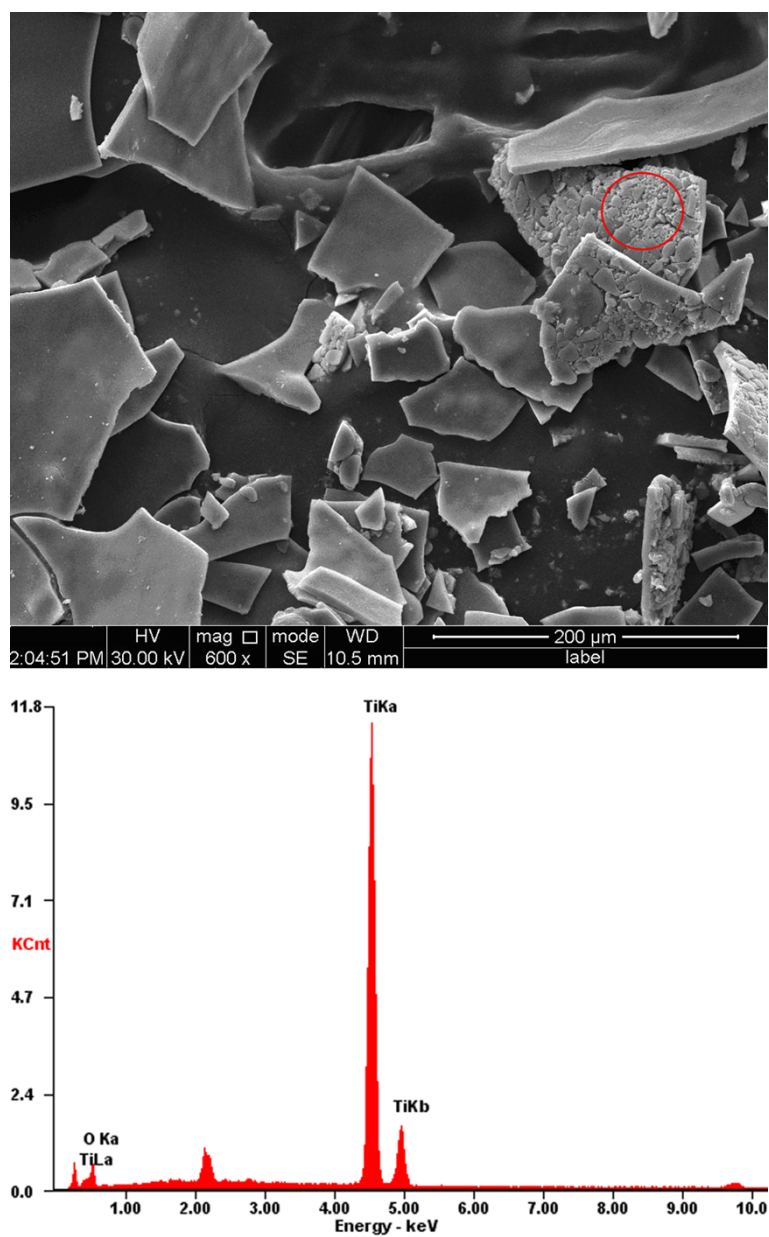

**Fig. S1** SEM image and EDS spectrum of assembled  $\text{TiO}_2$  NCs in sample A5. The red circle in SEM image indicates the discrete particles due to inadequate assembly.

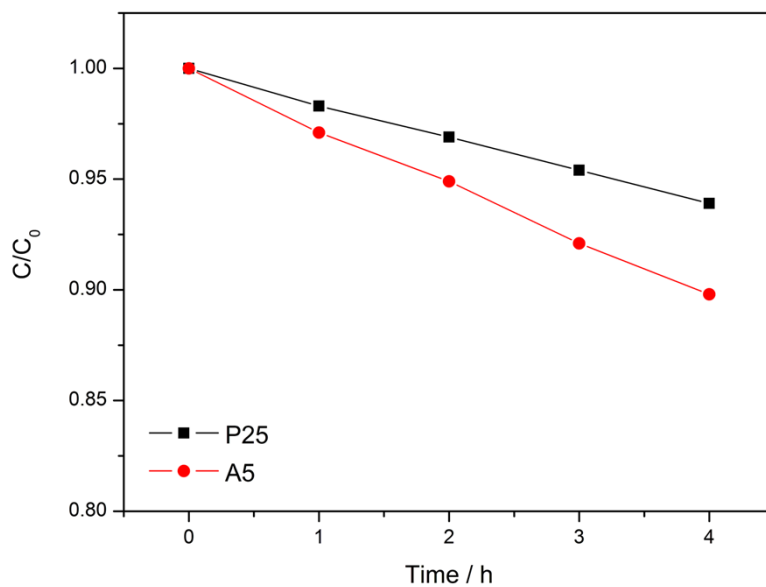

**Fig. S2** Comparison of photocatalytic activities of commercial P25 and assembled sample A5 under visible light irradiation (300 W halogen lamp,  $\lambda > 420$  nm). MB is used as the model with detection of the reduction of its absorption at 664 nm.

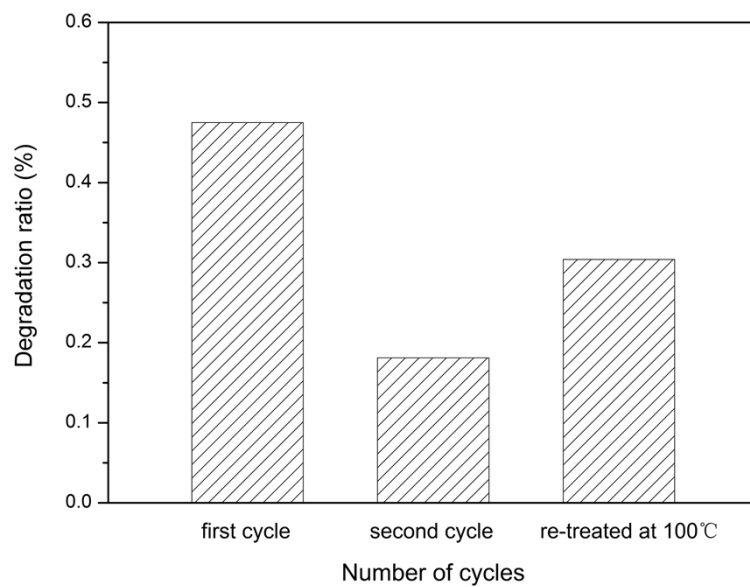

**Fig. S3** Cycle photodegradation of MB dye with the assembled sample A4 under visible light irradiation (300 W halogen lamp,  $\lambda > 420$  nm). first cycle: as prepared sample; second cycle: filtering and washing the catalyst after first cycle; re-treat at 100°C: treating the catalyst at 100°C for 3 h after first cycle.

**Table S1** The binding energy values of Ti2p and O1s in assembly and crushed powder.

|                | Ti2p <sub>3/2</sub> | Ti2p <sub>1/2</sub> | O1s <sub>1/2</sub> | *O1s <sub>1/2</sub> |
|----------------|---------------------|---------------------|--------------------|---------------------|
| Assembly       | 458.7, 459.5        | 464.6, 465.4        | 530.5              | 532.5               |
| Crushed powder | 458.7               | 464.6               | 530.5              | 532.7               |
